# Supplementary material
Source: ML conference proceedings conference paper supplement (https://openreview.net/forum?id=FgakGFpll1)
Supplement: supplementary_material [file attachment]

---

# A Metadata-Driven Approach to Understand Graph Neural Networks

---

Anonymous Author(s)

Affiliation

Address

email

|    |                                                                            |           |
|----|----------------------------------------------------------------------------|-----------|
| 1  | <b>Contents</b>                                                            |           |
| 2  | <b>1 Introduction</b>                                                      | <b>3</b>  |
| 3  | <b>2 Related Work</b>                                                      | <b>4</b>  |
| 4  | 2.1 Analysis on the Limitations of GNNs . . . . .                          | 4         |
| 5  | 2.2 Data-Driven Analysis in Graph Machine Learning . . . . .               | 4         |
| 6  | 2.3 Impact of Node Degrees on GNN Performance . . . . .                    | 5         |
| 7  | <b>3 A Metadata-Driven Analysis on GNNs</b>                                | <b>5</b>  |
| 8  | 3.1 Understanding GNNs with Metadata . . . . .                             | 5         |
| 9  | 3.2 Data Properties and Model Performance . . . . .                        | 6         |
| 10 | 3.3 Analysis Results . . . . .                                             | 6         |
| 11 | <b>4 Theoretical Analysis on the Impact of Degree Distribution</b>         | <b>7</b>  |
| 12 | 4.1 Notations and Sketch of Analysis . . . . .                             | 7         |
| 13 | 4.2 Degree-Corrected Contextual Stochastic Block Model (DC-CSBM) . . . . . | 8         |
| 14 | 4.3 Linear Separability After Graph Convolution . . . . .                  | 9         |
| 15 | 4.4 Implications on Gini-Degree . . . . .                                  | 9         |
| 16 | <b>5 Controlled Experiment on Gini-Degree</b>                              | <b>10</b> |
| 17 | <b>6 Conclusion</b>                                                        | <b>10</b> |
| 18 | <b>A Definitions of Dataset Properties</b>                                 | <b>13</b> |
| 19 | A.1 Basic . . . . .                                                        | 13        |
| 20 | A.2 Distance . . . . .                                                     | 14        |
| 21 | A.3 Connectivity . . . . .                                                 | 14        |
| 22 | A.4 Clustering . . . . .                                                   | 14        |
| 23 | A.5 Degree Distribution . . . . .                                          | 14        |

|    |                                                                                                      |           |
|----|------------------------------------------------------------------------------------------------------|-----------|
| 24 | A.6 Attribute . . . . .                                                                              | 14        |
| 25 | <b>B Experiment Setup for Obtaining Metadata</b>                                                     | <b>15</b> |
| 26 | <b>C Proof of Theorem 4.4</b>                                                                        | <b>15</b> |
| 27 | <b>D Controlled Experiments of Identified Salient Factors</b>                                        | <b>21</b> |
| 28 | Note: This supplemental material contains both the main paper and the appendix for self-consistency. |           |
| 29 | Some minor corrections (that do not affect our main conclusions) are made as we further proofread    |           |
| 30 | our paper.                                                                                           |           |

## Abstract

Graph Neural Networks (GNNs) have achieved remarkable success in various applications, but their performance can be sensitive to specific data properties of the graph datasets they operate on. Current literature on understanding the limitations of GNNs has primarily employed a *model-driven* approach that leverages heuristics and domain knowledge from network science or graph theory to model the GNN behaviors, which is time-consuming and highly subjective. In this work, we propose a *metadata-driven* approach to analyze the sensitivity of GNNs to graph data properties, motivated by the increasing availability of graph learning benchmarks. We perform a multivariate sparse regression analysis on the metadata derived from benchmarking GNN performance across diverse datasets, yielding a set of salient data properties. To validate the effectiveness of our data-driven approach, we focus on one identified data property, the degree distribution, and investigate how this property influences GNN performance through theoretical analysis and controlled experiments. Our theoretical findings reveal that datasets with a more balanced degree distribution exhibit better linear separability of node representations, thus leading to better GNN performance. We also conduct controlled experiments using synthetic datasets with varying degree distributions, and the results align well with our theoretical findings. Collectively, both the theoretical analysis and controlled experiments verify that the proposed metadata-driven approach is effective in identifying critical data properties for GNNs.

## 1 Introduction

Graph Neural Networks (GNNs), as a broad family of graph machine learning models, have gained increasing research interests in recent years. However, unlike the ResNet model [10] in computer vision or the Transformer model [32] in natural language processing, there has not been a dominant GNN architecture that is universally effective across a wide range of graph machine learning tasks. This may be attributed to the inherently diverse nature of graph-structured data, which results in the GNN performance being highly sensitive to specific properties of the graph datasets. Consequently, GNNs that demonstrate high performance on certain benchmark datasets often underperform on others with distinct properties. For example, early GNNs have been shown to exhibit degraded performance when applied to non-homophilous graph datasets, where nodes from different classes are highly interconnected and mixed [40, 41, 28, 8, 7].

However, it is non-trivial to identify and understand critical graph data properties that are highly influential on GNN performance. Current literature primarily employs what we term as a *model-driven* approach, which attempts to model GNN performance using specific heuristics or domain knowledge derived from network science or graph theory [36, 40]. Although this approach can offer an in-depth understanding of GNN performance, it can also be time-consuming, subjective, and may not fully capture the entire spectrum of relevant data properties.

To address these limitations and complement the model-driven approach, we propose a *metadata-driven approach* to identify critical data properties affecting GNN performance. With the increasing availability of diverse benchmark datasets for graph machine learning [12, 23], we hypothesize that critical graph data properties can be inferred from the benchmarking performance of GNNs on these datasets, which can be viewed as the metadata of the datasets. More concretely, we carry out a multivariate sparse regression analysis on the metadata obtained from large-scale benchmark experiments [23] involving multiple GNN models and a variety of graph datasets. Through this regression analysis, we examine the correlation between GNN performance and the data properties of each dataset, thereby identifying a set of salient data properties that significantly influence GNN performance.

To validate the effectiveness of the proposed metadata-driven approach, we further focus on a specific salient data property, degree distribution, identified from the regression analysis, and investigate the mechanism by which this data property affects GNN performance. In particular, our regression analysis reveals a decline in GNN performance as the degree distribution becomes more imbalanced. We delve deeper into this phenomenon through a theoretical analysis and a controlled experiment.

We initiate our investigation with a theoretical analysis of the GNN performance under the assumption that the graph data is generated by a Degree-Corrected Contextual Stochastic Block Model (DC-CSBM). Here, we define DC-CSBM by combining and generalizing the Contextual Stochastic Block Model [4] and the Degree-Corrected Stochastic Block Model [13]. Building upon the analysis by Baranwal et al. [3], we establish a novel theoretical result on how the degree distribution impacts the linear separability of the GNN representations and subsequently, the GNN performance. Within the DC-CSBM context, our theory suggests that more imbalanced degree distribution leads to few nodes being linearly separable in their GNN representations, thus negatively impacting GNN performance.

Complementing our theoretical analysis, we conduct a controlled experiment, evaluating GNN performance on synthetic graph datasets with varying degree distribution while holding other properties fixed. Remarkably, we observe a consistent decline in GNN performance correlating with the increase of the Gini coefficient of degree distribution, which reflects the imbalance of degree distribution. This observation further corroborates the findings of our metadata-driven regression analysis.

In summary, our contribution in this paper is two-fold. Firstly, we introduce a novel metadata-driven approach to identify critical graph data properties affecting GNN performance and demonstrate its effectiveness through a case study on a specific salient data property identified by our approach. Secondly, we develop an in-depth understanding of how the degree distribution of graph data influences GNN performance through both a novel theoretical analysis and a carefully controlled experiment, which is of interest to the graph machine learning community in its own right.

## 2 Related Work

### 2.1 Analysis on the Limitations of GNNs

There has been a wealth of existing literature investigating the limitations of GNNs. However, most of the previous works employ the model-driven approach. Below we summarize a few well-known limitations of GNNs while acknowledging that an exhaustive review of the literature is impractical. Among the limitations identified, GNNs have been shown to be sensitive to the extent of homophily in graph data, and applying GNNs to non-homophilous data often has degraded performance [1, 7, 19, 41, 40]. In addition, over-smoothing, a phenomenon where GNNs lose their discriminative power with deeper layers [16, 30, 5], is a primary concern particularly for node-level prediction tasks where distinguishing the nodes within the graph is critical. Further, when applied to graph-level prediction tasks, GNNs are limited by their ability to represent and model specific functions or patterns on graph-structured data, an issue often referred to as the expressiveness problem of GNNs. [36, 26, 21, 38]. Most of these limitations are understood through a *model-driven* approach, which offers in-depth insights but is time-consuming and highly subjective. In contrast, this paper presents a *metadata-driven* approach, leveraging metadata from benchmark datasets to efficiently screen through a vast array of data properties.

### 2.2 Data-Driven Analysis in Graph Machine Learning

With the increasing availability of graph learning benchmarks, there have been several recent studies that leverage diverse benchmarks for data-driven analysis. For example, Liu et al. [20] presents a principled pipeline to taxonomize benchmark datasets. Specifically, by applying a number of different perturbation methods on each dataset and obtaining the sensitivity profile of the resulting GNN performance on perturbed datasets, they perform hierarchical clustering on these sensitivity profiles to cluster statistically similar datasets. However, this study only aims to categorize datasets instead of identifying salient data properties that influence GNN performance. Ma et al. [23] establish a Graph Learning Indexer (GLI) library that curates a large collection of graph learning benchmarks and GNN models and conducts a large-scale benchmark study. We obtain our metadata from their benchmarks. Palowitch et al. [27] introduce a GraphWorld library that can generate diverse synthetic graph datasets with various properties. These synthetic datasets can be used to test GNN models through controlled experiments. In this paper, we have used this library to verify the effectiveness of the identified critical data properties.

## 2.3 Impact of Node Degrees on GNN Performance

There have also been a few studies investigating the impact of node degrees on GNNs. In particular, it has been observed that within a single graph dataset, there tends to be an accuracy discrepancy among nodes with varying degrees [31, 18, 39, 35]. Typically, GNN predictions on nodes with lower degrees tend to have lower accuracy. However, the finding of the Gini coefficient of the degree distribution as a strong indicator of GNN performance is novel. Furthermore, this indicator describes the dataset-level characteristics, allowing comparing GNN performance across different graph datasets. In addition, this paper presents a novel theoretical analysis, directly relating the degree distribution to the generalization performance of GNNs.

## 3 A Metadata-Driven Analysis on GNNs

### 3.1 Understanding GNNs with Metadata

**Motivation.** Real-world graph data are heterogeneous and incredibly diverse, contrasting with images or texts that often possess common structures or vocabularies. The inherent diversity of graph data makes it particularly challenging, if not unfeasible, to have one model to rule all tasks and datasets in the graph machine learning domain. Indeed, specific types of GNN models often only perform well on a selected set of graph learning datasets. For example, the expressive power of GNNs [36] is primarily relevant to graph-level prediction tasks rather than node-level tasks – higher-order GNNs with improved expressive power are predominantly evaluated on graph-level prediction tasks [26, 36]. As another example, several early GNNs such as Graph Convolution Networks (GCN) [15] or Graph Attention Networks (GAT) [33] only work well when the graphs exhibit homophily [40]. Consequently, it becomes crucial to identify and understand the critical data properties that influence the performance of different GNNs, allowing for more effective model design and selection.

The increasing availability of graph learning benchmarks that offer a wide range of structural and feature variations [12, 23] presents a valuable opportunity: one can possibly infer critical data properties from the performance of GNNs on these datasets. To systematically identify these critical data properties, we propose to conduct a regression analysis on the metadata of the benchmarks.

**Regression Analysis on Metadata.** In the regression analysis, the performance metrics of various GNN models on each dataset serve as the dependent variables, while the extracted data properties from each dataset act as the independent variables. Formally, we denote the number of datasets as  $n$ , the number of GNN models as  $q$ , and the number of data properties as  $p$ . Define the response variables  $\{\mathbf{y}_i\}_{i \in [q]}$  to be GNN model performance operated on each dataset and the covariate variables  $\{\mathbf{x}_j\}_{j \in [p]}$  to be properties of each dataset. Note that  $\mathbf{y}_i \in \mathbb{R}^n, \forall i \in [q]$  and  $\mathbf{x}_j \in \mathbb{R}^n, \forall j \in [p]$ . For ease of notation, we define  $\mathbf{Y} = (\mathbf{y}_1, \dots, \mathbf{y}_q) \in \mathbb{R}^{n \times q}$  to be the response matrix of  $n$  samples and  $q$  variables, and  $\mathbf{X} = (\mathbf{x}_1, \dots, \mathbf{x}_p) \in \mathbb{R}^{n \times p}$  to be the covariate matrix of  $n$  samples and  $p$  variables.

Given these data matrices, we establish the following multivariate linear model to analyze the relationship between response matrix  $\mathbf{Y}$  and covariate matrix  $\mathbf{X}$ , which is characterized by the coefficient matrix  $\mathbf{B}$ .

**Definition 3.1** (Multivariate Linear Model).

$$\mathbf{Y} = \mathbf{X}\mathbf{B} + \mathbf{W}, \quad (1)$$

where  $\mathbf{B} \in \mathbb{R}^{p \times q}$  is the coefficient matrix and  $\mathbf{W} = (\mathbf{w}_1, \dots, \mathbf{w}_q) \in \mathbb{R}^{n \times q}$  is the matrix of error terms.

Our goal is to find the most salient data properties that correlate with the performance of GNN models given a number of samples. To this end, we introduce two sparse regularizers for feature selections, which leads to the following Multivariate Sparse Group Lasso problem.

**Definition 3.2** (Multivariate Sparse Group Lasso Problem).

$$\arg\min_{\mathbf{B}} \frac{1}{2n} \|\mathbf{Y} - \mathbf{X}\mathbf{B}\|_2^2 + \lambda_1 \|\mathbf{B}\|_1 + \lambda_g \|\mathbf{B}\|_{2,1}, \quad (2)$$

where  $\|\mathbf{B}\|_1 = \sum_{i=1}^p \sum_{j=1}^q |\mathbf{B}_{ij}|$  is the  $L_1$  norm of  $\mathbf{B}$ ,  $\|\mathbf{B}\|_{2,1} = \sum_{i=1}^p \sqrt{\sum_{j=1}^q \mathbf{B}_{ij}^2}$  is the  $L_{2,1}$  group norm of  $\mathbf{B}$ , and  $\lambda_1, \lambda_g > 0$  are the corresponding penalty parameters.

177 In particular, the  $L_1$  penalty encourages the coefficient matrix  $\mathbf{B}$  to be sparse, only selecting salient  
 178 data properties. The  $L_{2,1}$  penalty further leverages the structure of the dependent variables and tries  
 179 to make only a small set of the GNN models’ performance depends on each data property, thus  
 180 differentiating the impacts on different GNNs.

181 To solve for the coefficient matrix  $\mathbf{B}$  in Equation 2, we employ an R package, MSGGLasso [17],  
 182 using matrices  $\mathbf{Y}$  and  $\mathbf{X}$  as input. To ensure proper input for the MSGGLasso solver [17], we have  
 183 preprocessed the data by standardizing the columns of both  $\mathbf{Y}$  and  $\mathbf{X}$ .

### 184 3.2 Data Properties and Model Performance

185 Next, we introduce the metadata used for the regression analysis. We obtain both the benchmark  
 186 datasets and the model performance using the Graph Learning Indexer (GLI) library [23].

187 **Data Properties.** We include the following benchmark datasets in our regression analysis: cora [37],  
 188 citeseer [37], pubmed [37], texas [29], cornell [29], wisconsin [29], actor [29], squirrel [29],  
 189 chameleon [29], arxiv-year [19], snap-patents [19], penn94 [19], pokec [19], genius [19], and  
 190 twitch-gamers [19]. For each graph dataset, we calculate 15 data properties, which can be categorized  
 191 into the following six groups:

- 192 • *Basic*: Edge Density, Average Degree, Degree Assortativity;
- 193 • *Distance*: Pseudo Diameter;
- 194 • *Connectivity*: Relative Size of Largest Connected Component (RSLCC);
- 195 • *Clustering*: Average Clustering Coefficient (ACC), Transitivity, Degeneracy;
- 196 • *Degree Distribution*: Gini Coefficient of Degree Distribution (Gini-Degree);
- 197 • *Attribute*: Edge Homogeneity, In-Feature Similarity, Out-Feature Similarity, Feature Angular  
 198 SNR, Homophily Measure, Attribute Assortativity.

199 The formal definition of these graph properties can be found in Appendix A.

200 **Model Performance.** For GNN models, we include GCN [15], GAT [33], GraphSAGE [9],  
 201 MoNet [25], MixHop [1], and LINKX [19] into our regression analysis. We also include a non-graph  
 202 model, Multi-Layer Perceptron (MLP). The complete experimental setup for these models can be  
 203 found in Appendix B.

### 204 3.3 Analysis Results

205 The estimated coefficient matrix  $\mathbf{B}$  is presented in Table 1. As can be seen, the estimated coefficient  
 206 matrix is fairly sparse, allowing us to identify salient data properties. Next, we will discuss the six  
 207 most salient data properties that correlate to some or all of the GNN models’ performance. For the  
 208 data properties that have an impact on all GNNs’ performance, we call them **Universal Factors**;  
 209 for the data properties that have an impact on over one-half of GNNs’ performance, we call them  
 210 **Selective Factors**. Notice that the  $(+, -)$  sign after the name of the factors indicates whether this  
 211 data property has a positive or negative correlation with the GNN performance.

212 **Universal Factors.** We discover that the Gini coefficient of the degree distribution (Gini-Degree),  
 213 Edge Homogeneity, and In-Feature Similarity impact all GNNs’ model performance consistently.

- 214 • *Gini-Degree*  $(-)$  measures how the graph’s degree distribution deviates from the perfectly  
 215 equal distribution, i.e., a regular graph. This is a crucial data property that dramatically  
 216 influences GNNs’ performance but remains under-explored in prior literature.
- 217 • *Edge Homogeneity*  $(+)$  is a salient indicator for all GNN models’ performance. This phe-  
 218 nomenon coincides with the fact that various GNNs assume strong homophily condition [24]  
 219 to obtain improvements on node classification tasks [9, 15, 33].
- 220 • *In-feature Similarity*  $(+)$  calculates the average of feature similarity within each class. Under  
 221 the homophily assumption, GNNs work better when nodes with the same labels additionally  
 222 have similar node features, which also aligns with existing findings in the literature [11].

Table 1: The estimated coefficient matrix  $\mathbf{B}$  of the multivariate sparse regression analysis. Each entry indicates the strength (magnitude) and direction (+, −) of the relationship between a graph data property and the performance of a GNN model. The six most salient data properties are indicated in **bold**.

| Graph Data Property          | GCN     | GAT     | GraphSAGE | MoNet   | MixHop  | LINKX   | MLP     |
|------------------------------|---------|---------|-----------|---------|---------|---------|---------|
| Edge Density                 | 0       | 0       | 0         | 0       | 0       | 0.0253  | 0.0983  |
| <b>Average Degree</b>        | 0.2071  | 0       | 0.1048    | 0.1081  | 0       | 0.3363  | 0       |
| <b>Pseudo Diameter</b>       | 0       | -0.349  | -0.1531   | 0       | -0.4894 | -0.3943 | -0.6119 |
| Degree Assortativity         | 0       | 0       | 0         | -0.0744 | 0       | 0       | 0       |
| RSLCC                        | 0.1019  | 0       | 0         | 0.0654  | 0       | 0.1309  | 0       |
| ACC                          | 0       | 0       | 0         | 0       | 0       | 0       | -0.0502 |
| Transitivity                 | 0       | -0.0518 | 0         | -0.1372 | 0       | 0.2311  | 0       |
| Degeneracy                   | 0       | 0       | 0         | 0       | 0       | 0       | -0.1657 |
| <b>Gini-Degree</b>           | -0.4403 | -0.2961 | -0.3267   | -0.2944 | -0.4205 | -0.367  | -0.1958 |
| <b>Edge Homogeneity</b>      | 0.7094  | 0.4705  | 0.7361    | 0.8122  | 0.6407  | 0.2006  | 0.4776  |
| <b>In-Feature Similarity</b> | 0.3053  | 0.1081  | 0.1844    | 0.1003  | 0.4613  | 0.6396  | 0.2399  |
| Out-Feature Similarity       | 0       | 0       | 0         | 0       | 0       | 0       | 0       |
| <b>Feature Angular SNR</b>   | 0.2522  | 0       | 0.2506    | 0       | 0.2381  | 0.3563  | 0.3731  |
| Homophily Measure            | 0       | 0.4072  | 0         | 0       | 0       | 0       | 0       |
| Attribute Assortativity      | 0       | 0       | 0         | 0       | 0       | 0       | 0       |

**Selective Factors.** We find that Average Degree, Pseudo Diameter, and Feature Angular SNR are salient factors for a subset of GNN models, although we do not yet have a good understanding on the mechanism of how these data properties impact model performance.

- *Average Degree* (+) is more significant for GCN, GraphSAGE, MoNet, and LINKX.
- *Pseudo Diameter* (−) is more significant for GAT, GraphSAGE, MixHop, LINKX, and MLP.
- *Feature Angular SNR* (+) is more significant for GCN, GraphSAGE, MixHop, LINKX, and MLP.

We note that the regression analysis only indicates associative relationships between data properties and the model performance. While our analysis has successfully identified well-known influential data properties, e.g., Edge Homogeneity, the mechanism for most identified data properties through which they impact the GNN performance remains under-explored.

To further verify the effectiveness of the proposed metadata-driven approach in identifying critical data properties, we perform an in-depth analysis for *Gini-Degree*, which is one of the most salient Universal Factors. In the following Section 4 and 5, we conduct theoretical analysis and controlled experiments to understand how Gini-Degree influences GNNs’ performance.

## 4 Theoretical Analysis on the Impact of Degree Distribution

In this section, we present a theoretical analysis on influence of graph data’s degree distribution on the performance of GNNs. Specifically, our analysis investigates the linear separability of node representations produced by applying graph convolution to the node features. In the case that the graph data comes from a Degree-Corrected Stochastic Block Model, we show that nodes from different classes are more separable when their degree exceeds a threshold. This separability result relates the graph data’s degree distribution to the GNN performance. Finally, we discuss the role of Gini-Degree on the GNN performance using implications of our theory.

### 4.1 Notations and Sketch of Analysis

**The Graph Data.** Let  $\mathcal{G} = \{\mathcal{V}, \mathcal{E}\}$  be an undirected graph, where  $\mathcal{V}$  is the set of nodes and  $\mathcal{E}$  is the set of edges. The information regarding the connections within the graph can also be summarized as an adjacency matrix  $\mathbf{A} \in \{0, 1\}^{|\mathcal{V}| \times |\mathcal{V}|}$ , where  $|\mathcal{V}|$  is the number of nodes in the graph  $\mathcal{G}$ . Each node  $i \in \mathcal{V}$  possesses a  $d$ -dimensional feature vector  $\mathbf{x}_i \in \mathbb{R}^d$ . The features for all nodes in  $\mathcal{G}$  can be

stacked and represented as a feature matrix  $\mathbf{X} \in \mathbb{R}^{|\mathcal{V}| \times d}$ . In the context of node classification, each node  $i$  is associated with a class label  $y_i \in \mathcal{C}$ , where  $\mathcal{C}$  is the set of labels.

**Graph Convolutional Network [15].** In our analysis, we consider a single-layer graph convolution, which can be defined as an operation on the adjacency matrix and feature matrix of a graph  $\mathcal{G}$  to produce a new feature matrix  $\tilde{\mathbf{X}}$ . Formally, the output of a single-layer graph convolution operation can be represented as  $\tilde{\mathbf{X}} = \mathbf{D}^{-1} \tilde{\mathbf{A}} \mathbf{X}$ , where  $\tilde{\mathbf{A}} = \mathbf{A} + \mathbf{I}$  is the augmented adjacency matrix with added self-loops, and  $\mathbf{D}$  is the diagonal degree matrix with  $\mathbf{D}_{ii} = \deg(i) = \sum_{j \in [n]} \tilde{\mathbf{A}}_{ij}$ . Hence, for each node  $i \in \mathcal{V}$ , the new node representation will become  $\tilde{\mathbf{x}}_i \in \mathbb{R}^d$ , which is the  $i$ th row of the output matrix  $\tilde{\mathbf{X}}$ .

**Sketch of Our Analysis.** Our analysis builds upon and generalizes the theoretical framework introduced by Baranwal et al. [3], where they demonstrate that in comparison to raw node features, the graph convolution representations of nodes have better linear separability if the graph data comes from Contextual Stochastic Block Model (CSBM) [4, 6]. However, in CSBM, the nodes within the same class all have similar degrees with high probability, which prevents us to draw meaningful conclusions about the impact of degree distribution.

To better understand the role of degree distribution in the GNN performance, we develop a non-trivial generalization of the theory by Baranwal et al. [3]. Specifically, we first coin a new graph data generation model, Degree-Corrected Contextual Stochastic Block Model (DC-CSBM) that combines and generalizes Degree-Corrected SBM (DC-SBM) [13] and CSBM, and leverages heterogeneity in node degrees into consideration. Under DC-CSBM, we find that node degrees play a crucial role in the statistical properties of the node representations, and the node degrees have to exceed a certain threshold in order for the node representations to sufficiently leverage the neighborhood information and become reliably separable. Notably, the incorporation of the node degree heterogeneity into the analysis requires a non-trivial adaptation of the analysis by Baranwal et al. [3].

## 4.2 Degree-Corrected Contextual Stochastic Block Model (DC-CSBM)

In this section, we introduce the DC-CSBM that models the generation of graph data. Specifically, we assume the graph data is randomly sampled from a DC-CSBM with 2 classes.

**DC-CSBM With 2 Classes.** Let us define the class assignments  $(\epsilon_i)_{i \in [n]}$  as independent and identically distributed (i.i.d.) Bernoulli random variables coming from  $\text{Ber}(\frac{1}{2})$ , where  $n = |\mathcal{V}|$  is the number of nodes in the graph  $\mathcal{G}$ . These class assignments divide  $n$  nodes into 2 classes:  $C_0 = \{i \in [n] : \epsilon_i = 0\}$  and  $C_1 = \{i \in [n] : \epsilon_i = 1\}$ . Assume that inter-class edge probability is  $q$  and intra-class edge probability is  $p$ , and no self-loops are allowed. For each node  $i$ , we additionally introduce a degree-correction parameter  $\theta_i \in (0, n]$ , which can be interpreted as the propensity of node  $i$  to connect with others. Note that to keep the DC-SBM identifiable and easier to analyze, we adopt a normalization rule to enforce the following constraint:  $\sum_{i \in C_0} \theta_i = |C_0|$ ,  $\sum_{i \in C_1} \theta_i = |C_1|$  and thus  $\sum_{i \in \mathcal{V}} \theta_i = n$ .

**Assumptions on Adjacency Matrix and Feature Matrix.** Conditioning on  $(\epsilon_i)_{i \in [n]}$ , each entry of the adjacency matrix  $\mathbf{A}$  is a Poisson random variable with  $\mathbf{A}_{ij} \sim \text{Poi}(\theta_i \theta_j p)$  if  $i, j$  are in the same class and  $\mathbf{A}_{ij} \sim \text{Poi}(\theta_i \theta_j q)$  if  $i, j$  are in different classes. On top of this, let  $\mathbf{X} \in \mathbb{R}^{n \times d}$  be the feature matrix where each row  $\mathbf{x}_i$  represents the node feature of node  $i$ . Assume each  $\mathbf{x}_i$  is an independent  $d$ -dimensional Gaussian random vector with  $\mathbf{x}_i \sim \mathcal{N}(\boldsymbol{\mu}, \frac{1}{d} \mathbf{I})$  if  $i \in C_0$  and  $\mathbf{x}_i \sim \mathcal{N}(\boldsymbol{\nu}, \frac{1}{d} \mathbf{I})$  if  $i \in C_1$ . We let  $\boldsymbol{\mu}, \boldsymbol{\nu} \in \mathbb{R}^d$  to be fixed  $d$ -dimensional vectors with  $\|\boldsymbol{\mu}\|_2, \|\boldsymbol{\nu}\|_2 \leq 1$ , which serve as the Gaussian mean for the two classes.

Given a particular choice of  $n, \boldsymbol{\mu}, \boldsymbol{\nu}, p, q$  and  $\theta = (\theta_i)_{i \in [n]}$ , we can define a class of random graphs generated by these parameters and sample a graph from such DC-CSBM as  $\mathcal{G} = (\mathbf{A}, \mathbf{X}) \sim \text{DC-CSBM}(n, \boldsymbol{\mu}, \boldsymbol{\nu}, p, q, \theta)$ .



### 4.3 Linear Separability After Graph Convolution

**Linear Separability.** Linear separability refers to the ability to linearly differentiate nodes in the two classes based on their feature vectors. Formally, for any  $\mathcal{V}_s \subseteq \mathcal{V}$ , we say that  $\{\tilde{\mathbf{x}}_i : i \in \mathcal{V}_s\}$  is linearly separable if there exists some unit vector  $\mathbf{v} \in \mathbb{R}^d$  and a scalar  $b$  such that  $\mathbf{v}^\top \tilde{\mathbf{x}}_i + b < 0, \forall i \in C_0 \cap \mathcal{V}_s$  and  $\mathbf{v}^\top \tilde{\mathbf{x}}_i + b > 0, \forall i \in C_1 \cap \mathcal{V}_s$ . Note that linear separability is closely related to GNN performance. Intuitively, more nodes being linearly separable will lead to better GNN performance.

**Degree-Thresholded Subgroups of  $C_0$  and  $C_1$ .** To better control the behavior of graph convolution operation, we will focus on particular subgroups of  $C_0$  and  $C_1$  where the member nodes having degree-corrected factor larger or equal to a pre-defined threshold  $\alpha > 0$ . Slightly abusing the notations, we denote these subgroups as  $C_0(\alpha)$  and  $C_1(\alpha)$ , which are formally defined below.

**Definition 4.1** ( $\alpha$ -Subgroups). *Given any  $\alpha \in (0, n]$ , define  $\alpha$ -subgroups of  $C_0$  and  $C_1$  as follows:*

$$C_0(\alpha) = \{j \in [n] : \theta_j \geq \alpha \text{ and } j \in C_0\},$$

$$C_1(\alpha) = \{j \in [n] : \theta_j \geq \alpha \text{ and } j \in C_1\}.$$

Let  $\mathcal{V}_\alpha := C_0(\alpha) \cup C_1(\alpha)$ , we are interested in analyzing the linear separability of the node representations after the graph convolution operation, namely  $\{\tilde{\mathbf{x}}_i : i \in \mathcal{V}_\alpha\}$ . Recall that for each node  $i$ ,  $\tilde{\mathbf{x}}_i = \frac{1}{\deg(i)} \sum_{j \in \mathcal{N}(i)} \mathbf{x}_j$ , where  $\mathcal{N}(i)$  is the set of neighbors of node  $i$ .

**Relationship Between  $\alpha$  and Linear Separability.** We first make the following assumptions about the DC-CSBM, closely following the assumptions made by Baranwal et al. [3].

**Assumption 4.2** (Graph Size). *Assume the relationship between the graph size  $n$  and the feature dimension  $d$  follows  $\omega(d \log d) \leq n \leq O(\text{poly}(d))$ .*

**Assumption 4.3** (Edge Probabilities). *Define  $\Gamma(p, q) := \frac{p-q}{p+q}$ . Assume the edge probabilities  $p, q$  satisfy  $p, q = \omega(\log^2(n)/n)$  and  $\Gamma(p, q) = \Omega(1)$ .*

Theorem 4.4 asserts that if the threshold  $\alpha$  is not too small, then the set  $\mathcal{V}_\alpha = C_0(\alpha) \cup C_1(\alpha)$  can be linear separated with high probability. The proof of Theorem 4.4 can be found in Appendix C.

**Theorem 4.4** (Linear Separability of  $\alpha$ -Subgroups). *Suppose that Assumption 4.2 and 4.3 hold. For any  $(\mathbf{X}, \mathbf{A}) \sim \text{DC-CSBM}(n, \boldsymbol{\mu}, \boldsymbol{\nu}, p, q, \theta)$ , if  $\alpha = \omega\left(\max\left(\frac{1}{\log n}, \frac{\log n}{dn(p+q)\|\boldsymbol{\mu}-\boldsymbol{\nu}\|_2^2}\right)\right)$ , then*

$$\mathbb{P}(\{\tilde{\mathbf{x}}_i : i \in \mathcal{V}_\alpha\} \text{ is linearly separable}) = 1 - o_d(1),$$

where  $o_d(1)$  is a quantity that converges to 0 as  $d$  approaches infinity.

Note that Theorem 4.4 suggests that, when the heterogeneity of node degrees is taken into consideration, the nodes with degrees exceeding a threshold  $\alpha$  are more likely to be linearly separable. And the requirement for the threshold  $\alpha$  depends on the DC-CSBM parameters:  $n, p, q, \boldsymbol{\mu}, \boldsymbol{\nu}$ .

**Remark 4.5.** *If we let  $p, q \in \Theta(\frac{\log^3 n}{n})$  and  $\|\boldsymbol{\mu} - \boldsymbol{\nu}\|_2$  be fixed constant, then the requirement can be reduced to  $\alpha \in \omega(\frac{1}{\log n})$ , which is not too large. Given this particular setting and reasonable selection of  $p, q$ , the regime of acceptable  $\alpha$  is broad and thus demonstrates the generalizability of Theorem 4.4.*

### 4.4 Implications on Gini-Degree

Finally, we qualitatively discuss the relationship between Gini-Degree and GNNs' performance using the results from Theorem 4.4. For any  $\alpha > 0$  that meets the criteria in the statement, we can consider,

1. *Negative correlation between Gini-Degree and the size of  $\mathcal{V}_\alpha$ :* If the number of nodes and edges is fixed, a higher Gini-Degree implies more high-degree nodes in the network and thus the majority of nodes are receiving lower degrees. Clearly, if most of the nodes have lower degrees, then there will be fewer nodes having degrees exceeding a certain threshold proportional to  $\alpha^1$  and being placed in  $\mathcal{V}_\alpha$ . Hence, a dataset with a higher (or lower) Gini-Degree will lead to a smaller (or larger) size of  $\mathcal{V}_\alpha$ .

<sup>1</sup>Note that the expected value of the degree of node  $i$  is proportional to  $\theta_i$  when we ignore self-loops. (See Appendix C for more information.) Thus, the lower bound  $\alpha$  on degree-corrected factors can be translated to the lower bound  $n(p+q)\alpha$  on degrees.

Table 2: Controlled experiment results for varying *Gini-Degree*. Standard deviations are derived from 5 independent runs. The performances of all models except for MLP have an evident negative correlation with *Gini-Degree*.

| <i>Gini-Degree</i> | GCN         | GAT         | GraphSAGE   | MoNet       | MixHop      | LINKX       | MLP         |
|--------------------|-------------|-------------|-------------|-------------|-------------|-------------|-------------|
| 0.906              | 0.798±0.004 | 0.659±0.01  | 0.76±0.005  | 0.672±0.002 | 0.804±0.005 | 0.832±0.002 | 0.595±0.006 |
| 0.761              | 0.817±0.001 | 0.732±0.005 | 0.818±0.004 | 0.696±0.015 | 0.817±0.004 | 0.849±0.002 | 0.756±0.002 |
| 0.526              | 0.874±0.004 | 0.742±0.006 | 0.825±0.013 | 0.8±0.028   | 0.826±0.003 | 0.853±0.002 | 0.655±0.005 |
| 0.354              | 0.906±0.002 | 0.737±0.008 | 0.857±0.008 | 0.83±0.013  | 0.837±0.002 | 0.867±0.002 | 0.66±0.07   |
| 0.075              | 0.948±0.002 | 0.746±0.005 | 0.878±0.002 | 0.92±0.002  | 0.84±0.002  | 0.893±0.001 | 0.705±0.002 |

2. *Positive correlation between the size of  $\mathcal{V}_\alpha$  and model performance*: Intuitively, the GNN performance tends to be better if there are more nodes that can be linearly separable after graph convolution. Consequently, the GNN performance is positively relevant to the size of  $\mathcal{V}_\alpha$  corresponding to the minimum possible  $\alpha$ .

Combining the two factors above, our analysis suggests that Gini-Degree tends to have a negative correlation with GNNs’ performance.

## 5 Controlled Experiment on Gini-Degree

To further verify whether there is a causal relationship between the degree distribution of graph data (in particular, measured by Gini-Degree) and the GNN performance, we conduct a controlled experiment using synthetic graph datasets.

**Experiment Setup.** We first generate a series of synthetic graph datasets using the GraphWorld library [27]. To investigate the causal effect of Gini-Degree, we manipulate the data generation parameters to obtain datasets with varying Gini-Degree while keeping a bunch of other properties fixed. Specifically, we use the SBM generator in GraphWorld library and set the number of nodes  $n = 5000$ , the average degree as 30, the number of clusters as 4, cluster size slope as 0.5, feature center distance as 0.5, the edge probability ratio  $p/q = 4.0$ , feature dimension as 16, feature cluster variance as 0.05. The parameters above are fixed throughout our experiments and their complete definition can be found in the Appendix. By manipulating the power law exponent parameter of the generator, we obtain 5 synthetic datasets with Gini-Degree as 0.906, 0.801, 0.522, 0.329, 0.091 respectively.

Then we train the same set of GNN models and MLP model as mentioned in Table 1 on each dataset. We randomly split the nodes into training, validation, and test sets with a ratio 3:1:1. We closely follow the hyperparameters and the training protocol in the GLI library [23], which is where we obtain the metadata in Section 3. We run 5 independent trials with different random seeds.

**Experiment Results.** The experiment results are shown in Table 2<sup>2</sup>. We observe an evident monotonically decreasing trend for the performance of the graph-based models, GCN, GAT, GraphSAGE, MoNet, MixHop, and LINKX, as Gini-Degree increases. However, there is no clear pattern for the non-graph model, MLP. This result suggests that these widely-used GNN models are indeed sensitive to Gini-Degree, which validates our result of sparse regression analysis. Note that MLP does not take the graph structure into consideration, and hence the degree distribution has less influence on the performance of MLP. The result on MLP also indicates that we have done a reasonably well controlled experiment.

## 6 Conclusion

In this work, we propose a novel metadata-driven approach that can efficiently identify critical graph data properties influencing the performance of GNNs. This is a significant contribution given the diverse nature of graph-structured data and the sensitivity of GNN performance to these specific properties. We also verify the effectiveness of the proposed approach through an in-depth case study around one identified salient graph data property.

<sup>2</sup>Upon double checking our experiment code, we found a bug that makes some of the synthetic datasets partially corrupted. Therefore, we updated the results with the corrected code. The conclusion remains the same.

377 As a side product, this paper also highlights the considerable impact of the degree distribution, a salient  
 378 data property identified through our metadata-driven regression analysis, on the GNN performance.  
 379 We present a novel theoretical analysis and a carefully controlled experiment to demonstrate this  
 380 impact.

## 381 Limitations and Broader Impacts

382 We would like to note that the proposed metadata-driven approach cannot replace the model-driven  
 383 approach in understanding GNNs, as the identified salient data properties are only associative with  
 384 the GNN performance. Depending on the choice of the metadata, there may be spurious correlations  
 385 between the data properties and the GNN performance. However, the proposed approach can be an  
 386 effective supplement to the model-driven approach for large-scale screening of salient data properties,  
 387 leading to a faster iteration of research and development.

388 Regarding the broader impact, the proposed approach may be particularly useful for detecting  
 389 potential biases that exist in various GNN models by screening sensitive data properties. When  
 390 properly applied, this approach could effectively reduce potential harms caused by biased GNN  
 391 models, in human-centric application domains such as recommender systems.

## 392 References

- 393 [1] Sami Abu-El-Haija, Bryan Perozzi, Amol Kapoor, Nazanin Alipourfard, Kristina Lerman, Hrayr  
 394 Harutyunyan, Greg Ver Steeg, and Aram Galstyan. Mixhop: Higher-order graph convolutional  
 395 architectures via sparsified neighborhood mixing. In *international conference on machine*  
 396 *learning*, pages 21–29. PMLR, 2019.
- 397 [2] Robert J Adler, Jonathan E Taylor, et al. *Random fields and geometry*, volume 80. Springer,  
 398 2007.
- 399 [3] Aseem Baranwal, Kimon Fountoulakis, and Aukosh Jagannath. Graph convolution for semi-  
 400 supervised classification: Improved linear separability and out-of-distribution generalization.  
 401 *arXiv preprint arXiv:2102.06966*, 2021.
- 402 [4] Norbert Binkiewicz, Joshua T Vogelstein, and Karl Rohe. Covariate-assisted spectral clustering.  
 403 *Biometrika*, 104(2):361–377, 2017.
- 404 [5] Chen Cai and Yusu Wang. A note on over-smoothing for graph neural networks. *arXiv preprint*  
 405 *arXiv:2006.13318*, 2020.
- 406 [6] Yash Deshpande, Subhabrata Sen, Andrea Montanari, and Elchanan Mossel. Contextual  
 407 stochastic block models. *Advances in Neural Information Processing Systems*, 31, 2018.
- 408 [7] Yingdong Dou, Zhiwei Liu, Li Sun, Yutong Deng, Hao Peng, and Philip S Yu. Enhancing graph  
 409 neural network-based fraud detectors against camouflaged fraudsters. In *Proceedings of the*  
 410 *29th ACM International Conference on Information & Knowledge Management*, pages 315–324,  
 411 2020.
- 412 [8] Alex Fout, Jonathon Byrd, Basir Shariat, and Asa Ben-Hur. Protein interface prediction using  
 413 graph convolutional networks. *Advances in neural information processing systems*, 30, 2017.
- 414 [9] Will Hamilton, Zhitaoying, and Jure Leskovec. Inductive representation learning on large  
 415 graphs. *Advances in neural information processing systems*, 30, 2017.
- 416 [10] Kaiming He, Xiangyu Zhang, Shaoqing Ren, and Jian Sun. Deep residual learning for image  
 417 recognition. In *Proceedings of the IEEE conference on computer vision and pattern recognition*,  
 418 pages 770–778, 2016.
- 419 [11] Yifan Hou, Jian Zhang, James Cheng, Kaili Ma, Richard TB Ma, Hongzhi Chen, and Ming-  
 420 Chang Yang. Measuring and improving the use of graph information in graph neural networks.  
 421 In *International Conference on Learning Representations*, 2019.

- [12] Weihua Hu, Matthias Fey, Marinka Zitnik, Yuxiao Dong, Hongyu Ren, Bowen Liu, Michele Catasta, and Jure Leskovec. Open graph benchmark: Datasets for machine learning on graphs. *Advances in neural information processing systems*, 33:22118–22133, 2020.
- [13] Brian Karrer and Mark EJ Newman. Stochastic blockmodels and community structure in networks. *Physical review E*, 83(1):016107, 2011.
- [14] Diederik P Kingma and Jimmy Ba. Adam: A method for stochastic optimization. *arXiv preprint arXiv:1412.6980*, 2014.
- [15] Thomas N Kipf and Max Welling. Semi-supervised classification with graph convolutional networks. *arXiv preprint arXiv:1609.02907*, 2016.
- [16] Qimai Li, Zhichao Han, and Xiao-Ming Wu. Deeper insights into graph convolutional networks for semi-supervised learning. In *Proceedings of the AAAI conference on artificial intelligence*, volume 32, 2018.
- [17] Yanming Li, Bin Nan, and Ji Zhu. Multivariate sparse group lasso for the multivariate multiple linear regression with an arbitrary group structure. *Biometrics*, 71(2):354–363, 2015.
- [18] Langzhang Liang, Zenglin Xu, Zixing Song, Irwin King, and Jieping Ye. Resnorm: Tackling long-tailed degree distribution issue in graph neural networks via normalization. *arXiv preprint arXiv:2206.08181*, 2022.
- [19] Derek Lim, Felix Hohne, Xiuyu Li, Sijia Linda Huang, Vaishnavi Gupta, Omkar Bhalerao, and Ser Nam Lim. Large scale learning on non-homophilous graphs: New benchmarks and strong simple methods. *Advances in Neural Information Processing Systems*, 34:20887–20902, 2021.
- [20] Renming Liu, Semih Cantürk, Frederik Wenkel, Sarah McGuire, Xinyi Wang, Anna Little, Leslie O’Bray, Michael Perlmutter, Bastian Rieck, Matthew Hirn, et al. Taxonomy of benchmarks in graph representation learning. In *Learning on Graphs Conference*, pages 6–1. PMLR, 2022.
- [21] Xiao Liu, Lijun Zhang, and Hui Guan. Uplifting message passing neural network with graph original information, 2023.
- [22] Ilya Loshchilov and Frank Hutter. Decoupled weight decay regularization. *arXiv preprint arXiv:1711.05101*, 2017.
- [23] Jiaqi Ma, Xingjian Zhang, Hezheng Fan, Jin Huang, Tianyue Li, Ting Wei Li, Yiwen Tu, Chenshu Zhu, and Qiaozhu Mei. Graph learning indexer: A contributor-friendly and metadata-rich platform for graph learning benchmarks. *arXiv preprint arXiv:2212.04537*, 2022.
- [24] Miller McPherson, Lynn Smith-Lovin, and James M Cook. Birds of a feather: Homophily in social networks. *Annual review of sociology*, 27(1):415–444, 2001.
- [25] Federico Monti, Davide Boscaini, Jonathan Masci, Emanuele Rodola, Jan Svoboda, and Michael M Bronstein. Geometric deep learning on graphs and manifolds using mixture model cnns. In *Proceedings of the IEEE conference on computer vision and pattern recognition*, pages 5115–5124, 2017.
- [26] Christopher Morris, Martin Ritzert, Matthias Fey, William L Hamilton, Jan Eric Lenssen, Gaurav Rattan, and Martin Grohe. Weisfeiler and leman go neural: Higher-order graph neural networks. In *Proceedings of the AAAI conference on artificial intelligence*, volume 33, pages 4602–4609, 2019.
- [27] John Palowitch, Anton Tsitsulin, Brandon Mayer, and Bryan Perozzi. Graphworld: Fake graphs bring real insights for gnns. In *Proceedings of the 28th ACM SIGKDD Conference on Knowledge Discovery and Data Mining*, pages 3691–3701, 2022.
- [28] Shashank Pandit, Duen Horng Chau, Samuel Wang, and Christos Faloutsos. Netprobe: a fast and scalable system for fraud detection in online auction networks. In *Proceedings of the 16th international conference on World Wide Web*, pages 201–210, 2007.

- [29] Hongbin Pei, Bingzhe Wei, Kevin Chen-Chuan Chang, Yu Lei, and Bo Yang. Geom-gcn: Geometric graph convolutional networks. *arXiv preprint arXiv:2002.05287*, 2020.
- [30] T Konstantin Rusch, Michael M Bronstein, and Siddhartha Mishra. A survey on oversmoothing in graph neural networks. *arXiv preprint arXiv:2303.10993*, 2023.
- [31] Xianfeng Tang, Huaxiu Yao, Yiwei Sun, Yiqi Wang, Jiliang Tang, Charu Aggarwal, Prasenjit Mitra, and Suhang Wang. Investigating and mitigating degree-related biases in graph convolutional networks. In *Proceedings of the 29th ACM International Conference on Information & Knowledge Management*, pages 1435–1444, 2020.
- [32] Ashish Vaswani, Noam Shazeer, Niki Parmar, Jakob Uszkoreit, Llion Jones, Aidan N Gomez, Łukasz Kaiser, and Illia Polosukhin. Attention is all you need. *Advances in neural information processing systems*, 30, 2017.
- [33] Petar Veličković, Guillem Cucurull, Arantxa Casanova, Adriana Romero, Pietro Lio, and Yoshua Bengio. Graph attention networks. *arXiv preprint arXiv:1710.10903*, 2017.
- [34] Roman Vershynin. *High-dimensional probability: An introduction with applications in data science*, volume 47. Cambridge university press, 2018.
- [35] Quanmin Wei, Jinyan Wang, Xingcheng Fu, Jun Hu, and Xianxian Li. Aic-gnn: Adversarial information completion for graph neural networks. *Information Sciences*, 2023.
- [36] Keyulu Xu, Weihua Hu, Jure Leskovec, and Stefanie Jegelka. How powerful are graph neural networks? *arXiv preprint arXiv:1810.00826*, 2018.
- [37] Zhilin Yang, William Cohen, and Ruslan Salakhudinov. Revisiting semi-supervised learning with graph embeddings. In *International conference on machine learning*, pages 40–48. PMLR, 2016.
- [38] Jiaxuan You, Jonathan M Gomes-Selman, Rex Ying, and Jure Leskovec. Identity-aware graph neural networks. In *Proceedings of the AAAI conference on artificial intelligence*, volume 35, pages 10737–10745, 2021.
- [39] Sukwon Yun, Kibum Kim, Kanghoon Yoon, and Chanyoung Park. Lte4g: Long-tail experts for graph neural networks. In *Proceedings of the 31st ACM International Conference on Information & Knowledge Management*, pages 2434–2443, 2022.
- [40] Jiong Zhu, Yujun Yan, Lingxiao Zhao, Mark Heimann, Leman Akoglu, and Danai Koutra. Beyond homophily in graph neural networks: Current limitations and effective designs. *Advances in Neural Information Processing Systems*, 33:7793–7804, 2020.
- [41] Jiong Zhu, Ryan A Rossi, Anup Rao, Tung Mai, Nedim Lipka, Nesreen K Ahmed, and Danai Koutra. Graph neural networks with heterophily. In *Proceedings of the AAAI Conference on Artificial Intelligence*, volume 35, pages 11168–11176, 2021.

## 503 A Definitions of Dataset Properties

504 We introduce the formal definitions of the dataset properties mentioned in Section 3.2. Following the  
 505 definitions in Section 4.1, we further define  $n = |\mathcal{V}|$  and  $m = |\mathcal{E}|$  to denote the number of nodes and  
 506 edges of graph  $\mathcal{G}$ . Also, in the context of the node classification task, we define  $\mathcal{Y} \in \mathbb{R}^n$  as the vector  
 507 of node labels and  $C$  as the number of classes.

### 508 A.1 Basic

509 **Edge Density:** The edge density for an undirected graph is calculated as  $\frac{2m}{n(n-1)}$ , while for a directed  
 510 graph, it is computed as  $\frac{m}{n(n-1)}$ .

511 **Average Degree:** The average degree for an undirected graph is defined as  $\frac{2m}{n}$ , while for a directed  
 512 graph, it is defined as  $\frac{m}{n}$ .

513 **Degree Assortativity:** The degree assortativity is the average Pearson correlation coefficient of all  
 514 pairs of connected nodes. It quantifies the tendency of nodes in a network to be connected to nodes  
 515 with similar or dissimilar degrees and ranges between -1 and 1.

## 516 A.2 Distance

517 **Pseudo Diameter:** The pseudo diameter is an approximation of the diameter of a graph and provides  
 518 a lower bound estimation of its exact value.

## 519 A.3 Connectivity

520 **Relative Size of Largest Connected Component (RSLCC):** The relative size of the largest con-  
 521 nected component is determined by calculating the ratio between the size of the largest connected  
 522 component and  $n$ .

## 523 A.4 Clustering

524 **Average Clustering Coefficient (ACC):** First define  $T(u)$  as the number of triangles including node  
 525  $u$ , then the local clustering coefficient for node  $u$  is calculated as  $\frac{2}{deg(u)(deg(u)-1)}T(u)$  for undirected  
 526 graph, where  $deg(u)$  is the degree of node  $u$ ; and is calculated as  $\frac{2}{deg^{tot}(u)(deg^{tot}(u)-1)-2deg^{\leftrightarrow}(u)}T(u)$   
 527 for directed graph, where  $deg^{tot}(u)$  is the sum of in-degree and out-degree of node  $u$  and  $deg^{\leftrightarrow}(u)$   
 528 is the reciprocal degree of  $u$ . The average clustering coefficient is then defined as the average local  
 529 clustering coefficient of all the nodes in the graph.

530 **Transitivity:** The transitivity is defined as the fraction of all possible triangles present in the graph.  
 531 Formally, it can be written as  $3\frac{\#triangles}{\#triads}$ , where a *triad* is a pair of two edges with a shared vertex.

532 **Degeneracy:** The degeneracy is determined as the least integer  $k$  such that every induced subgraph  
 533 of the graph contains a vertex with its degree smaller or equal to  $k$ .

## 534 A.5 Degree Distribution

535 **Gini Coefficient of Degree Distribution (Gini-Degree):** The Gini coefficient of the node degrees of  
 536 the graph.

## 537 A.6 Attribute

538 **Edge Homogeneity [27]:** The edge homogeneity is defined as the ratio of edges whose endpoints  
 539 have the same node labels.

540 **In-Feature Similarity [27]:** First define within-class angular feature similarity as  $1 -$   
 541  $angular\_distance(\mathbf{x}_i, \mathbf{x}_j)$  for an edge  $(i, j)$  with its endpoints  $i$  and  $j$  have the same node labels.  
 542 In-Feature Similarity is the average within-class angular feature similarity of all such edges in the  
 543 graph.

544 **Out-Feature Similarity [27]:** First define between-class angular feature similarity as  $1 -$   
 545  $angular\_distance(\mathbf{x}_i, \mathbf{x}_j)$  for an edge  $(i, j)$  with its endpoints  $i$  and  $j$  have different node labels.  
 546 Out-Feature Similarity is the average between-class angular feature similarity of all such edges in the  
 547 graph.

548 **Feature Angular SNR [27]:** The feature angular SNR is computed as the ratio between in-feature  
 549 similarity and out-feature similarity.

550 **Homophily Measure [19]:** The homophily measure is defined as

$$\hat{h} = \frac{1}{C-1} \sum_{k=1}^C [h_k - \frac{|C_k|}{n}]_+,$$

where  $[a]_+ = \max(a, 0)$ ,  $|C_k|$  is the total number of nodes having their label  $k$  and  $h_k$  is the class-wise homophily metric defined below,

$$h_k = \frac{\sum_{u: \mathcal{Y}_u=k} d_u^{(\mathcal{Y}_u)}}{\sum_{u: \mathcal{Y}_u=k} d_u},$$

where  $d_u$  is the number of neighbors of node  $u$  and  $d_u^{(\mathcal{Y}_u)}$  is the number of neighbors of node  $u$  having the same node label.

**Attribute Assortativity:** The attribute assortativity is the average Pearson correlation coefficient of all pairs of connected nodes. It quantifies the tendency of nodes in a network to be connected to nodes with the same or different attributes (here node label) and ranges between -1 and 1.

## B Experiment Setup for Obtaining Metadata

In this section, we describe more details of the experimental setup to obtain GNNs' performance that we use in Section 3.2, mostly following Ma et al. [23]. For completeness, we list down the model setting used by them in the following paragraphs.

GCN [15], GAT [33], GraphSAGE [9], MoNet [25], MLP, and MixHop [1] are set to have two layers with hidden dimension equals to 8. For LINKX [19],  $MLP_A$ ,  $MLP_X$  are set to be a one-layer network and  $MLP_f$  to be a two-layers network, following the setting in Lim et al. [19].

For the rest of the training settings, we adopt the same configuration for all experiments. Specifically, we set learning rate = 0.01, weight decay = 0.001, dropout rate = 0.6, max epoch = 10000, and batch size = 256. We use Adam [14] as an optimizer for all models except LINKX. AdamW [22] is used with LINKX in order to comply with Lim et al. [19]. For datasets with binary labels (i.e., penn94, pokec, genius, and twitch-gamers), we choose the ROC AUC score as the evaluation metric; while for other datasets, we use test accuracy instead.

We also let all the detailed model settings remain consistent with the same with Ma et al. [23]. Namely,

- GAT: Number of heads in multi-head attention = 8. leakyReLU angle of negative slope = 0.2. No residual is applied. The dropout rate on attention weight is the same as the overall dropout.
- GraphSAGE: Aggregator type is GCN. No norm is applied.
- MoNet: Number of kernels = 3. Dimension of pseudo-coordinate = 2. Aggregator type = sum.
- MixHop: List of powers of adjacency matrix = [1, 2, 3]. No norm is applied. Layer Dropout rate = 0.9.
- LINKX: No inner activation.

## C Proof of Theorem 4.4

**Proof Sketch.** To prove Theorem 4.4, we first show that degree and the neighborhood distribution of each node concentrate with high probability. Then we claim that the node features after the convolution operation will be centered around specific mean values, depending on the node classes. Finally, we demonstrate that the nodes in different classes can be linearly separated by the hyperplane passing through the mid-point of the two mean values  $\mu, \nu$  with high probability.

We prove the intermediate results in Lemma C.4 (degree and neighborhood distribution concentration inequalities) by utilizing Lemma C.5 (Chernoff bound for Poisson random variable) and in Lemma C.6 (convoluted feature concentration) by making use of Lemma C.7 (Borell's inequality). Finally, given the requirement of  $\alpha$  stated in Theorem 4.4, we argue that the convoluted node features in two classes can be linearly separated with a high level of confidence.

**Novelty of our Proof.** The general structure of our proof follows that of Baranwal et al. [3]. However, our analysis requires non-trivial adaptation of the proof by Baranwal et al. [3]. This is

because we have a more general data model, DC-CSBM, where the CSBM assumed by Baranwal et al. [3] is a restricted special case of ours. In particular, we assume each edge is generated by the Poisson random variable following DC-SBM, instead of the Bernoulli random variable assumed by CSBM; we also incorporate the degree-corrected factor in our analysis to model node degree heterogeneity within communities, which gives us the flexibility to discuss linear separability for subgraphs with different levels of sparsity.

Before we state and prove Lemma C.4, let us first define the following events that we will work on.

**Definition C.1** (Class Size Concentration). *For any  $\delta > 0$ , define*

$$\mathbf{I}_1(\delta) = \left\{ \frac{n}{2}(1 - \delta) \leq |C_0|, |C_1| \leq \frac{n}{2}(1 + \delta) \right\}.$$

**Definition C.2** (Degree Concentration). *For any  $\delta' > 0$  and for each node  $i \in [n]$ , define*

$$\mathbf{I}_{2,i}(\delta') = \left\{ \frac{1}{2}(p + q)(1 - \delta')\theta_i \leq \frac{D_{ii}}{n} \leq \frac{1}{2}(p + q)(1 + \delta')\theta_i \right\}.$$

**Definition C.3** (Neighborhood Distribution Concentration). *For any  $\delta' > 0$  and for each node  $i \in [n]$ , define*

$$\begin{aligned} \mathbf{I}_{3,i}(\delta') = & \left\{ \frac{(1 - \epsilon_i)p + \epsilon_i q}{p + q}(1 - \delta') \leq \frac{|C_0 \cap \mathcal{N}_i|}{D_{ii}} \leq \frac{(1 - \epsilon_i)p + \epsilon_i q}{p + q}(1 + \delta') \right\} \\ & \cap \left\{ \frac{(1 - \epsilon_i)q + \epsilon_i p}{p + q}(1 - \delta') \leq \frac{|C_1 \cap \mathcal{N}_i|}{D_{ii}} \leq \frac{(1 - \epsilon_i)q + \epsilon_i p}{p + q}(1 + \delta') \right\}, \end{aligned}$$

where  $\mathcal{N}_i$  denotes the set of nodes connected to node  $i$ .

Then in Lemma C.4, we argue that for nodes in the  $\alpha$ -subgroup defined in 4.1 for some appropriately chosen  $\alpha > 0$ , the above events will happen simultaneously with high probability.

**Lemma C.4** (Concentration Inequalities). *Given  $\alpha \in (\frac{1}{\log n}, n]$ ,  $C_0(\alpha), C_1(\alpha)$  defined by Definition 4.1, and  $\mathcal{V}_\alpha = C_0(\alpha) \cup C_1(\alpha)$ . Let  $\delta = n^{-1/2+\epsilon}$  and  $\delta' = (\alpha \log n)^{-1/2+\epsilon}$ , then for  $\epsilon > 0$  small enough, we have for any  $c > 0$ , there is some  $C > 0$  such that*

$$\mathbb{P} \left( \mathbf{I}_1(\delta) \cap \bigcap_{i \in \mathcal{V}_\alpha} \mathbf{I}_{2,i}(\delta') \cap \bigcap_{i \in \mathcal{V}_\alpha} \mathbf{I}_{3,i}(\delta') \right) \geq 1 - \frac{C}{n^c}.$$

*Proof.* Firstly, we consider the event  $\mathbf{I}_1(\delta)$ . Since  $(\epsilon_i)_{i \in [n]} \sim \text{Ber}(\frac{1}{2})$ , by the Chernoff bound for sums of independent Bernoulli random variables [34, Theorem 2.3.1], we have for any  $\delta > 0$  that

$$\mathbb{P} \left( \left| \frac{1}{n} \sum_{i=1}^n \epsilon_i - \frac{1}{2} \right| \geq \delta/2 \right) \leq 2 \exp(-n\delta^2/6).$$

Notice that  $\sum_{i=1}^n \epsilon_i = |C_1|$  and  $|C_0| + |C_1| = n$ , we can conclude that for any  $\delta > 0$ , the probability that the number of nodes in each class concentrates will satisfy

$$\mathbb{P} \left( \frac{|C_0|}{n}, \frac{|C_1|}{n} \in \left[ \frac{1}{2} - \delta, \frac{1}{2} + \delta \right] \right) \geq 1 - C \exp(-cn\delta^2),$$

for some constant  $C, c > 0$ .

We now turn to the events  $\{\mathbf{I}_{2,i}(\delta')\}_{i \in [n]}$ . Notice that the node degrees are sums of independent Poisson random variables. It is known that sums of independent Poisson random variables will be another Poisson random variable. Hence, conditioning on  $\theta = (\theta_i)_{i \in [n]}$ , for each node  $i \in [n]$ , we have

$$D_{ii} \sim 1 + \text{Poi}\left(\frac{n-1}{2}(p+q)\theta_i\right),$$

where  $D_{ii}$  is the degree of node  $i$ , and

$$\mathbb{E}[D_{ii}] = 1 + \frac{n-1}{2}(p+q)\theta_i.$$

To prove that  $\mathbf{I}_{2,i}(\delta')$  will occur with high probability for each  $i \in [n]$ , we introduce the following result [34, Corollary 2.3.7] whose proof can be found in the referred literature:



624 **Lemma C.5** (Corollary 2.3.7 [34]). *If  $X \sim \text{Poi}(\lambda)$ , then for  $t \in (0, \lambda]$ , we have*

$$\mathbb{P}(|X - \lambda| \geq t) \leq 2 \exp(-\frac{ct^2}{\lambda}).$$

625

626 Here, we can let  $t = \delta' \lambda$  where  $\delta' \in (0, 1]$  and get a tail bound as follows:

$$\mathbb{P}(|D_{ii} - \mathbb{E}[D_{ii}]| \geq \delta' \mathbb{E}[D_{ii}]) \leq 2 \exp(-\frac{c(\delta' \mathbb{E}[D_{ii}])^2}{\mathbb{E}[D_{ii}]}) = 2 \exp(-c \mathbb{E}[D_{ii}] \delta'^2).$$

627 It follows that for each  $i \in [n]$  and any  $\delta' \in (0, 1]$ , we have

$$\mathbb{P}\left(\frac{D_{ii}}{n} \in \left[\frac{1}{2}(p+q)(1-\delta')\theta_i, \frac{1}{2}(p+q)(1+\delta')\theta_i\right]^c\right) \leq C \exp(-cn(p+q)\theta_i \delta'^2),$$

628 for some  $C, c > 0$ .

629 We next consider the events  $\{\mathbf{I}_{3,i}(\delta')\}_{i \in [n]}$ . Observe that for each node  $i$ , we can decompose node  
630 degree as  $D_{ii} = D_{ii}^{\text{intra}} + D_{ii}^{\text{inter}}$ , where

$$D_{ii}^{\text{intra}} = \sum_{j \in \mathcal{N}(i)} \mathbb{1}\{\epsilon_j = \epsilon_i\},$$

631 and

$$D_{ii}^{\text{inter}} = \sum_{j \in \mathcal{N}(i)} \mathbb{1}\{\epsilon_j \neq \epsilon_i\}.$$

632 Obviously,  $D_{ii}^{\text{intra}} = |C_{\epsilon_i} \cap \mathcal{N}_i|$  and  $D_{ii}^{\text{inter}} = |C_{1-\epsilon_i} \cap \mathcal{N}_i|$  will concentrate around  $\frac{np\theta_i}{2}$  and  $\frac{nq\theta_i}{2}$ ,  
633 correspondingly. And given the tail bound for  $\{\mathbf{I}_{2,i}(\delta')\}_{i \in [n]}$ , by a similar argument, we have for  
634 each  $i \in [n]$  and any  $\delta' \in (0, 1]$ ,

$$\mathbb{P}(\mathbf{I}_{3,i}(\delta')) \geq 1 - C \exp(-cn(p+q)\theta_i \delta'^2),$$

635 for some  $C, c > 0$ .

636 Define the union event  $U(\delta, \delta') = \mathbf{I}_1(\delta) \cap_{i \in \mathcal{V}_\alpha} \mathbf{I}_{2,i}(\delta') \cap_{i \in \mathcal{V}_\alpha} \mathbf{I}_{3,i}(\delta')$ . Recall that  $\forall i \in \mathcal{V}_\alpha$ , we have  
637  $\theta_i \geq \alpha$ . Thus, we can then choose  $\delta = n^{-1/2+\epsilon}$  and  $\delta' = (\alpha \log n)^{-1/2+\epsilon}$ . Since  $p, q = \omega(\frac{\log^2 n}{n})$   
638 from Assumption 4.3, by a simple union bound, we have for  $\epsilon > 0$  small enough, for any  $c > 0$  there  
639 is  $C > 0$  such that

$$\mathbb{P}(U(n^{-1/2+\epsilon}, (\alpha \log n)^{-1/2+\epsilon})) \geq 1 - \frac{C}{n^c}. \quad (3)$$

640 Finally, we establish the lower bound for  $\alpha$  indicated in the statement, which is  $\frac{1}{\log n}$ . The reason  
641 why we need this lower bound is that if  $\alpha$  is too small, then the subgroups:  $C_0(\alpha), C_1(\alpha)$  will be too  
642 sparse that their member nodes' degree is too small to assure the concentration inequalities.

643 By the definition of the event:  $U(\delta, \delta')$  and union bound, we have

$$\begin{aligned} \mathbb{P}(\mathbf{I}_1(\delta)) &\leq C \exp(-cn\delta^2) \\ &\leq C \exp(-cn^{2\epsilon}) && (\text{plug in } \delta = n^{-1/2+\epsilon}) \\ &\leq C/n^c && (\text{if we choose } \epsilon \geq \frac{\log \log n}{2 \log n} > 0), \end{aligned}$$

644 and

$$\begin{aligned} \mathbb{P}\left(\bigcap_{i \in \mathcal{V}_\alpha} \mathbf{I}_{2,i}(\delta') \bigcap_{i \in \mathcal{V}_\alpha} \mathbf{I}_{3,i}(\delta')\right) &\leq n \cdot C \exp(-cn(p+q)\alpha \delta'^2) \\ &\leq n \cdot C \exp(-c \log^2 n \cdot \alpha \delta'^2) && (\text{by Assumption 4.3}) \\ &= C \exp(\log n - c \log^2 n \cdot \alpha (\alpha \log n)^{-1+2\epsilon}) && (\text{plug in } \delta' = (\alpha \log n)^{-1/2+\epsilon}) \\ &= C \exp(\log n - c \log n \cdot (\alpha \log n)^{2\epsilon}) \\ &= C \exp(\log n \cdot (1 - c \cdot (\alpha \log n)^{2\epsilon})) \\ &= C n^{1-c \cdot (\alpha \log n)^{2\epsilon}}. \end{aligned}$$

645 We want to assure the last term stays in  $O(1/n^\beta)$ , for some  $\beta > 0$ . Equivalently, for any  $c > 0$  in  
 646 the above term, we can choose  $\epsilon > 0$  small enough to make  $1 - c \cdot (\alpha \log n)^{2\epsilon} < 0$ . Hence, we can  
 647 conclude that a natural lower bound for  $\alpha$  should be  $\frac{1}{\log n}$ , i.e.,  $\alpha > \frac{1}{\log n}$ .

648 Thus, combining Equation 3 with this fact, we complete the proof.

649 □

650 Next, in Lemma C.6, we claim that given the adjacency matrix  $\mathbf{A}$ , class memberships  $(\epsilon_i)_{i \in [n]}$ ,  
 651 degree-corrected factors  $(\theta_i)_{i \in [n]}$  and a pre-defined threshold  $\alpha > 0$ , then with high probability, the  
 652 convoluted node features  $\tilde{\mathbf{x}}_i \approx \frac{p\boldsymbol{\mu} + q\boldsymbol{\nu}}{p+q}$  for  $i \in C_0(\alpha)$  and  $\tilde{\mathbf{x}}_i \approx \frac{q\boldsymbol{\mu} + p\boldsymbol{\nu}}{p+q}$  for  $i \in C_1(\alpha)$ , where  $D_{ii}$  is  
 653 the degree of node  $i$ .

654 **Lemma C.6** (Convoluted Feature Concentration). *Given  $\alpha \in (\frac{1}{\log n}, n]$ ,  $C_0(\alpha), C_1(\alpha)$  defined by  
 655 Definition 4.1, and  $\mathcal{V}_\alpha = C_0(\alpha) \cup C_1(\alpha)$ . Conditionally on  $\mathbf{A}$ ,  $(\epsilon_i)_{i \in [n]}$  and  $(\theta_i)_{i \in [n]}$ , we have that  
 656 for any  $c > 0$  and some  $C > 0$ , with probability at least  $1 - \frac{C}{n^c}$ , for every node  $i \in \mathcal{V}_\alpha$  and any unit  
 657 vector  $\mathbf{w}$ ,*

$$\begin{aligned} \left| \left\langle \tilde{\mathbf{x}}_i - \frac{p\boldsymbol{\mu} + q\boldsymbol{\nu}}{p+q}, \mathbf{w} \right\rangle (1 + o(1)) \right| &= O \left( \sqrt{\frac{\log n}{dn(p+q)\alpha}} \right) \text{ for } i \in C_0(\alpha), \\ \left| \left\langle \tilde{\mathbf{x}}_i - \frac{q\boldsymbol{\mu} + p\boldsymbol{\nu}}{p+q}, \mathbf{w} \right\rangle (1 + o(1)) \right| &= O \left( \sqrt{\frac{\log n}{dn(p+q)\alpha}} \right) \text{ for } i \in C_1(\alpha). \end{aligned}$$

659 *Proof.* Since  $(\mathbf{X}, \mathbf{A})$  is sampled from DC-CSBM( $\boldsymbol{\mu}, \boldsymbol{\nu}, p, q, \theta$ ), when conditioning on  $(\epsilon_i)_{i \in [n]}$ , we  
 660 have node  $i$ 's node feature  $\mathbf{x}_i \sim \mathcal{N}(\mathbf{m}_i, \frac{1}{d}I)$  where  $\mathbf{m}_i = \boldsymbol{\mu}$  if  $i \in C_0$  and  $\mathbf{m}_i = \boldsymbol{\nu}$  if  $i \in C_1$ . We  
 661 can also write

$$\mathbf{x}_i = (1 - \epsilon_i)\boldsymbol{\mu} + \epsilon_i\boldsymbol{\nu} + \frac{g_i}{\sqrt{d}},$$

662 where  $g_i \sim \mathcal{N}(\mathbf{0}, \mathbf{I})$  is standard normal vector.

663 On the other hand, conditioning on the adjacency matrix  $\mathbf{A}$  and class memberships  $\epsilon = (\epsilon_i)_{i \in [n]}$ , the  
 664 mean of the convoluted feature of node  $i$  can be written as

$$m(i) = \mathbb{E}[\tilde{\mathbf{x}}_i | \mathbf{A}, \epsilon] = \frac{1}{D_{ii}} \sum_{j \in [n]} \tilde{\mathbf{A}}_{ij} \mathbf{m}_j,$$

665 by the definition of the graph convolution operation ( $\tilde{\mathbf{x}}_i = [\mathbf{D}^{-1} \tilde{\mathbf{A}} \mathbf{X}]_i$ ).

666 Thus, for any unit vector  $\mathbf{w}$ , we have

$$\tilde{\mathbf{x}}_i \cdot \mathbf{w} = \frac{1}{D_{ii}} \sum_{j \in [n]} \tilde{\mathbf{A}}_{ij} \langle \mathbf{x}_j, \mathbf{w} \rangle = \langle m(i), \mathbf{w} \rangle + \frac{1}{D_{ii}\sqrt{d}} \sum_{j \in [n]} \tilde{\mathbf{A}}_{ij} \cdot \langle g_j, \mathbf{w} \rangle. \quad (4)$$

667 Let us define  $F_i = \frac{1}{D_{ii}\sqrt{d}} \sum_{j \in [n]} \tilde{\mathbf{A}}_{ij} \cdot \langle g_j, \mathbf{w} \rangle$  and observe that  $\langle g_j, \mathbf{w} \rangle$  is a standard Gaussian  
 668 random variable for all  $j \in [n]$ . Thus, we have that  $F_i \sim \mathcal{N}(0, \frac{1}{dD_{ii}})$ , conditioning on the adjacency  
 669 matrix  $\mathbf{A}$ . Now we introduce Borell's inequality [2] to give a high-probability bound of  $|F_i|$  for all  
 670  $i \in \mathcal{V}_\alpha$ .

671 **Lemma C.7** (Borell's Inequality, Theorem 2.1.1 in Adler et al. [2]). *Let  $F_i \sim \mathcal{N}(0, \sigma_F^2)$  for each  
 672  $i \in \mathcal{V}_\alpha$ . Then for any  $K > 0$ , we have*

$$\mathbb{P}(\max_{i \in \mathcal{V}_\alpha} F_i - \mathbb{E}[\max_{i \in \mathcal{V}_\alpha} F_i] > K) \leq \exp(-K^2/2\sigma_F^2).$$

673 We can further define the event  $Q_\alpha = Q_\alpha(t) = \{\max_{i \in \mathcal{V}_\alpha} |F_i| \leq t\}$ . Observe that

$$\begin{aligned} \mathbb{P}(Q_\alpha^c) &= \mathbb{P}(\max_{i \in \mathcal{V}_\alpha} |F_i| > t) \\ &\leq 2\mathbb{P}(\max_{i \in \mathcal{V}_\alpha} F_i > t) \\ &= 2\mathbb{P}(\max_{i \in \mathcal{V}_\alpha} F_i - \mathbb{E}[\max_{i \in \mathcal{V}_\alpha} F_i] > t - \mathbb{E}[\max_{i \in \mathcal{V}_\alpha} F_i]). \end{aligned}$$

674 If we let the union event  $U := U(n^{-1/2+\epsilon}, (\alpha \log n)^{-1/2+\epsilon})$  defined the same as in Lemma C.4,  
 675 then by Lemma C.7

$$\begin{aligned}\mathbb{P}(Q_\alpha^c) &\leq \mathbb{P}(U \cap Q_\alpha^c) + \mathbb{P}(U^c) \\ &\leq 2n \exp(-c'(t - \mathbb{E}[\max_{i \in \mathcal{V}_\alpha} F_i])^2 dD_{ii}) + \frac{1}{n^c} \\ &\leq 2n \exp(-c''(t - \mathbb{E}[\max_{i \in \mathcal{V}_\alpha} F_i])^2 dn(p+q)\alpha) + \frac{1}{n^c},\end{aligned}$$

676 for any  $c > 0$  and some  $c', c'' > 0$ .

677 By the fact that for some  $k > 0$ ,

$$\mathbb{E}[\max_{i \in \mathcal{V}_\alpha} F_i] \leq k\sqrt{\log n / \sigma_F^2} = k\sqrt{\frac{\log n}{dn(p+q)\alpha}},$$

678 we can choose  $t = C'\sqrt{\frac{\log n}{dn(p+q)\alpha}}$  for some large constant  $C' > k > 0$  to obtain

$$t - \mathbb{E}[\max_{i \in \mathcal{V}_\alpha} F_i] \geq C'\sqrt{\frac{\log n}{dn(p+q)\alpha}} - k\sqrt{\frac{\log n}{dn(p+q)\alpha}} > 0.$$

679 Thus, we have

$$\begin{aligned}\mathbb{P}(U \cap Q_\alpha) &\geq 1 - \mathbb{P}(U^c) - \mathbb{P}(Q_\alpha^c) \\ &\geq 1 - \frac{2}{n^c} - 2n \exp(-c''(t - \mathbb{E}[\max_{i \in \mathcal{V}_\alpha} F_i])^2 dn(p+q)\alpha) \\ &\geq 1 - \frac{2}{n^c} - \frac{2}{n^{c''(C'-k)^2-1}}.\end{aligned}$$

680 When conditioning on the event  $U$ , we have

$$m(i) = \frac{p\boldsymbol{\mu} + q\boldsymbol{\nu}}{p+q}(1 + o(1)) \quad \text{for } i \in C_0(\alpha), \quad (5)$$

$$m(i) = \frac{q\boldsymbol{\mu} + p\boldsymbol{\nu}}{p+q}(1 + o(1)) \quad \text{for } i \in C_1(\alpha). \quad (6)$$

681 Thus, on the event  $U \cap Q_\alpha$ , we have for each node  $i \in \mathcal{V}_\alpha$ ,

$$|\langle \tilde{\mathbf{x}}_i - m(i), \mathbf{w} \rangle| = O\left(\sqrt{\frac{\log n}{dn(p+q)\alpha}}\right),$$

682 which completes the proof.

683 □

684 Now we are ready to prove Theorem 4.4.

685 *Proof.* First observe that for all  $i$  and conditioning on the adjacency matrix  $\mathbf{A}$  and class memberships  
 686  $\epsilon = (\epsilon_i)_{i \in [n]}$ , the convoluted data of node  $i$ :  $\tilde{\mathbf{x}}_i$  is a Gaussian vector with independent entries and has  
 687 mean and covariance as follows:

$$\mathbb{E}(\tilde{\mathbf{x}}_i | \mathbf{A}, \epsilon) = m(i) = \frac{1}{D_{ii}} \left( \sum_{j \in \mathcal{N}(i)} \tilde{\mathbf{A}}_{ij} \mathbb{E}[\mathbf{x}_j | \epsilon] \right),$$

$$\text{Cov}(\tilde{\mathbf{x}}_i | \mathbf{A}, \epsilon) = \frac{1}{dD_{ii}} \mathbf{I},$$

688 which are direct implications given the definition of graph convolution operation defined in Section 4.

689 Note that conditioning on the event  $U(\delta, \delta')$  defined in Lemma C.4, we have that  $m(i)$  is given by  
 690 equations 5 and 6.

691 Recall the definition of linear separability, we need to find some unit vector  $\mathbf{v} \in \mathbb{R}^d$  and  $b \in \mathbb{R}$  such  
 692 that

$$\langle m(i) + \frac{1}{\sqrt{dD_{ii}}} g_i, \mathbf{v} \rangle + b < 0 \quad \text{for } i \in C_0(\alpha),$$

$$\langle m(i) + \frac{1}{\sqrt{dD_{ii}}} g_i, \mathbf{v} \rangle + b > 0 \quad \text{for } i \in C_1(\alpha),$$

693 where  $g_i \sim \mathcal{N}(\mathbf{0}, \mathbf{I})$  is a standard normal vector with independent entries.

694 We can fix  $\tilde{\mathbf{v}} = \frac{1}{2\gamma}(\boldsymbol{\nu} - \boldsymbol{\mu})$  and  $\tilde{b} = -\frac{\langle \boldsymbol{\mu} + \boldsymbol{\nu}, \tilde{\mathbf{v}} \rangle}{2}$ , where  $\gamma = \frac{1}{2}\|\boldsymbol{\mu} - \boldsymbol{\nu}\|_2$ . By Assumption 4.3,  
 695 Lemma C.4 and C.6, with probability at least  $1 - O(n^{-c})$  for any  $c > 0$ , for all  $i \in C_0(\alpha)$ , we have

$$\begin{aligned} & \langle \tilde{\mathbf{x}}_i, \tilde{\mathbf{v}} \rangle + \tilde{b} \\ &= \frac{\langle p\boldsymbol{\mu} + q\boldsymbol{\nu}, \tilde{\mathbf{v}} \rangle}{p+q} (1 + o(1)) + O\left(\|\tilde{\mathbf{v}}\| \frac{1}{\sqrt{dn(p+q)\alpha}} \max_{i \in [n]} |\langle g_i, \mathbf{v} \rangle|\right) + \tilde{b} \\ &= \left\langle \frac{2(p\boldsymbol{\mu} + q\boldsymbol{\nu}) - (p+q)(\boldsymbol{\mu} + \boldsymbol{\nu})}{2(p+q)}, \tilde{\mathbf{v}} \right\rangle (1 + o(1)) + O\left(\frac{1}{\sqrt{dn(p+q)\alpha}} \max_{i \in [n]} |\langle g_i, \mathbf{v} \rangle|\right) \\ &= -\gamma\Gamma(p, q)(1 + o(1)) + O\left(\sqrt{\frac{\log n}{dn(p+q)\alpha}}\right) \quad (\text{By Lemma C.6}) \\ &= -\gamma\Gamma(p, q)(1 + o(1)) + o(\gamma) \quad (\alpha \in \omega\left(\frac{\log n}{dn(p+q)\|\boldsymbol{\mu} - \boldsymbol{\nu}\|_2^2}\right)) \\ &< 0. \quad (\text{by Assumption 4.3}) \end{aligned}$$

696 Similarly, for all  $i \in C_1(\alpha)$ , we have

$$\begin{aligned} & \langle \tilde{\mathbf{x}}_i, \tilde{\mathbf{w}} \rangle + \tilde{b} \\ &= \frac{\langle q\boldsymbol{\mu} + p\boldsymbol{\nu}, \tilde{\mathbf{w}} \rangle}{p+q} (1 + o(1)) + O\left(\|\tilde{\mathbf{w}}\| \frac{1}{\sqrt{dn(p+q)\alpha}} \max_{i \in [n]} |\langle g_i, \mathbf{v} \rangle|\right) + \tilde{b} \\ &= \left\langle \frac{-2(p\boldsymbol{\mu} + q\boldsymbol{\nu}) + (p+q)(\boldsymbol{\mu} + \boldsymbol{\nu})}{2(p+q)}, \tilde{\mathbf{w}} \right\rangle (1 + o(1)) + O\left(\frac{1}{\sqrt{dn(p+q)\alpha}} \max_{i \in [n]} |\langle g_i, \mathbf{v} \rangle|\right) \\ &= \gamma\Gamma(p, q)(1 + o(1)) + O\left(\sqrt{\frac{\log n}{dn(p+q)\alpha}}\right) \quad (\text{By Lemma C.6}) \\ &= \gamma\Gamma(p, q)(1 + o(1)) + o(\gamma) \quad (\alpha \in \omega\left(\frac{\log n}{dn(p+q)\|\boldsymbol{\mu} - \boldsymbol{\nu}\|_2^2}\right)) \\ &> 0. \quad (\text{by Assumption 4.3}) \end{aligned}$$

697 The above two inequalities imply the linear separability of  $\{\tilde{\mathbf{x}}_i, i \in \mathcal{V}_\alpha\}$ , which completes the  
 698 proof.  $\square$

Table 3: Description of parameters used in the controlled experiments.

| Parameter Name           | Description                                                                |
|--------------------------|----------------------------------------------------------------------------|
| $n$                      | Number of vertices in the graph.                                           |
| cluster size slope       | the slope of cluster sizes when ordered by size.                           |
| feature dimension        | the number of dimensions of node features.                                 |
| feature center distance  | distance between feature cluster centers.                                  |
| $p/q$ ratio              | the ratio of intra-class edge probability to inter-class edge probability. |
| average degree           | the average expected degrees of nodes.                                     |
| power exponent           | the value of power-law exponent used to generate expected node degrees.    |
| feature cluster variance | variance of feature clusters around their centers.                         |

Table 4: Remaining parameters used in experiments. One of the parameters is manipulated to generate synthetic datasets with varying data properties indicated in the first column.

| Experiments                  | $p/q$ ratio  | Average Degree       | Power Exponent      | Feature Cluster Variance |
|------------------------------|--------------|----------------------|---------------------|--------------------------|
| <i>Gini-Degree</i>           | 3            | 20                   | [1.5, 2, 2.5, 3, 5] | 0.25                     |
| <i>Average Degree</i>        | 3            | [10, 20, 30, 40, 50] | 2                   | 0.25                     |
| <i>Edge Homogeneity</i>      | [1,2,3,5,10] | 20                   | 2                   | 0.1                      |
| <i>In-Feature Similarity</i> | 2            | 20                   | 2                   | [2, 1, 0.5, 0.2, 0.1]    |
| <i>Feature Angular SNR</i>   | 2            | 20                   | 2                   | [2, 1, 0.5, 0.2, 0.1]    |

## D Controlled Experiments of Identified Salient Factors

From Section 3.3, we discover six prominent dataset properties that correlate with some or all of the GNN models’ performance. In Section 5, we have presented controlled experiments for Gini-Degree to verify its relationship to GNNs’ performance (Table 2). In this section, we further conduct controlled experiments for all the remaining identified salient factors, except for *Pseudo Diameter*, which is hard to control via manipulating explicit parameters provided by GraphWorld.

Across all experiments, we fix the number of nodes  $n = 5000$ , cluster size slope as 0.0, the number of clusters as 4, feature dimension as 16, and feature center distance as 0.05. For each of the experiments, we will keep most of the remaining GraphWorld parameters the same and only vary one of the parameters. The remaining parameters that we will manipulate are the  $p/q$  ratio, average degree, power exponent, and feature cluster variance. We give a short description of all the parameters in Table 3. For completeness, we summarize the value of the remaining parameters used in all four experiments in Table 4.

Table 5, 6, and 7 show the results of the four controlled experiments, correspondingly. Note that varying feature cluster variance can manipulate *In-Feature Similarity* and *Feature Angular SNR* simultaneously (Table 7). In general, all the results closely follow the regression results indicated in Table 1 and the discussion in Section 3.3.

Table 5: Controlled experiment results for varying *Average Degree*. Standard deviations are derived from 5 independent runs. The performances of all models except for GAT, MixHop, and MLP have an evident positive correlation with *Average Degree*.

| <i>Average Degree</i> | GCN         | GAT         | GraphSAGE   | MoNet       | MixHop      | LINKX       | MLP         |
|-----------------------|-------------|-------------|-------------|-------------|-------------|-------------|-------------|
| 10                    | 0.71±0.018  | 0.67±0.009  | 0.725±0.002 | 0.556±0.024 | 0.696±0.001 | 0.693±0.006 | 0.632±0.004 |
| 20                    | 0.823±0.001 | 0.734±0.013 | 0.797±0.006 | 0.593±0.012 | 0.806±0.003 | 0.825±0.001 | 0.54±0.024  |
| 30                    | 0.839±0.005 | 0.722±0.017 | 0.801±0.002 | 0.761±0.005 | 0.756±0.002 | 0.852±0.003 | 0.653±0.004 |
| 40                    | 0.876±0.003 | 0.742±0.006 | 0.825±0.001 | 0.795±0.002 | 0.794±0.003 | 0.876±0.002 | 0.648±0.003 |
| 50                    | 0.9±0.004   | 0.734±0.019 | 0.86±0.002  | 0.814±0.003 | 0.788±0.011 | 0.89±0.005  | 0.651±0.002 |

Table 6: Controlled experiment results for varying *Edge Homogeneity*. Standard deviations are derived from 5 independent runs. The performances of all models except for MixHop and MLP have an evident positive correlation with *Edge Homogeneity*.

| <i>Edge Homogeneity</i> | GCN         | GAT         | GraphSAGE   | MoNet       | MixHop      | LINKX       | MLP         |
|-------------------------|-------------|-------------|-------------|-------------|-------------|-------------|-------------|
| 0.249                   | 0.737±0.004 | 0.565±0.009 | 0.732±0.005 | 0.515±0.004 | 0.836±0.002 | 0.823±0.005 | 0.744±0.033 |
| 0.375                   | 0.873±0.002 | 0.825±0.011 | 0.847±0.003 | 0.57±0.009  | 0.945±0.002 | 0.93±0.003  | 0.93±0.001  |
| 0.452                   | 0.917±0.002 | 0.887±0.004 | 0.896±0.007 | 0.598±0.005 | 0.947±0.001 | 0.949±0.002 | 0.784±0.09  |
| 0.559                   | 0.925±0.002 | 0.89±0.004  | 0.925±0.004 | 0.678±0.003 | 0.913±0.005 | 0.943±0.005 | 0.9±0.004   |
| 0.702                   | 0.946±0.004 | 0.933±0.004 | 0.953±0.001 | 0.802±0.003 | 0.942±0.001 | 0.959±0.001 | 0.865±0.004 |

Table 7: Controlled experiment results for varying *In-Feature Similarity / Feature Angular SNR*. Standard deviations are derived from 5 independent runs. The performances of all models except for MoNet have an evident positive correlation with *In-Feature Similarity / Feature Angular SNR*.

| <i>In-Feature Similarity</i> | <i>Feature Angular SNR</i> | GCN         | GAT         | GraphSAGE   | MoNet       | MixHop      | LINKX       | MLP         |
|------------------------------|----------------------------|-------------|-------------|-------------|-------------|-------------|-------------|-------------|
| 0.506                        | 1.009                      | 0.478±0.016 | 0.412±0.016 | 0.446±0.005 | 0.562±0.021 | 0.433±0.001 | 0.598±0.002 | 0.402±0.002 |
| 0.516                        | 1.022                      | 0.563±0.004 | 0.47±0.006  | 0.517±0.008 | 0.615±0.002 | 0.531±0.003 | 0.661±0.004 | 0.47±0.001  |
| 0.527                        | 1.039                      | 0.717±0.008 | 0.507±0.006 | 0.6±0.006   | 0.555±0.021 | 0.621±0.007 | 0.737±0.001 | 0.486±0.003 |
| 0.582                        | 1.101                      | 0.784±0.011 | 0.599±0.014 | 0.74±0.01   | 0.533±0.01  | 0.848±0.001 | 0.854±0.001 | 0.611±0.003 |
| 0.602                        | 1.154                      | 0.887±0.006 | 0.791±0.004 | 0.825±0.006 | 0.627±0.004 | 0.924±0.004 | 0.913±0.006 | 0.915±0.002 |
